# Supplementary material
Source: Research Square preprint supplement (doi:10.21203/rs.3.rs-8970895/v1)
Supplement: Supplementary file 1 [file fa18af516f63b451b599a692.docx]

**Supplemental Figures**

**
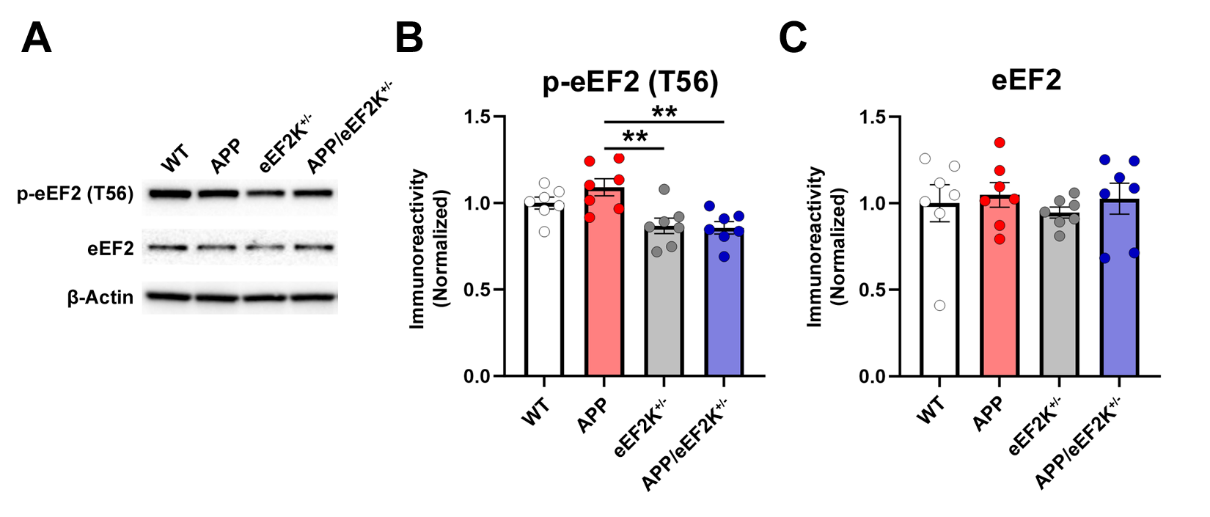
**

**Supplemental Figure 1: Conditional suppression of neuronal eEF2K decreased eEF2 phosphorylation.** (**A**) Representative western blot image for p-eEF2, eEF2, and β-Actin. (**B**) Western blot analysis of p-eEF2 in the hippocampus shows decreased p-eEF2 (T56) in eEF2K+/- and APP/eEF2K+/- mice. (**C**) Western blot analysis of eEF2 was not different between groups. WT, n=7; APP, n=7; eEF2K+/-, n=7; APP/eEF2K+/-, n=7. One-way ANOVA with Tukey’s post hoc test. **p<0.01


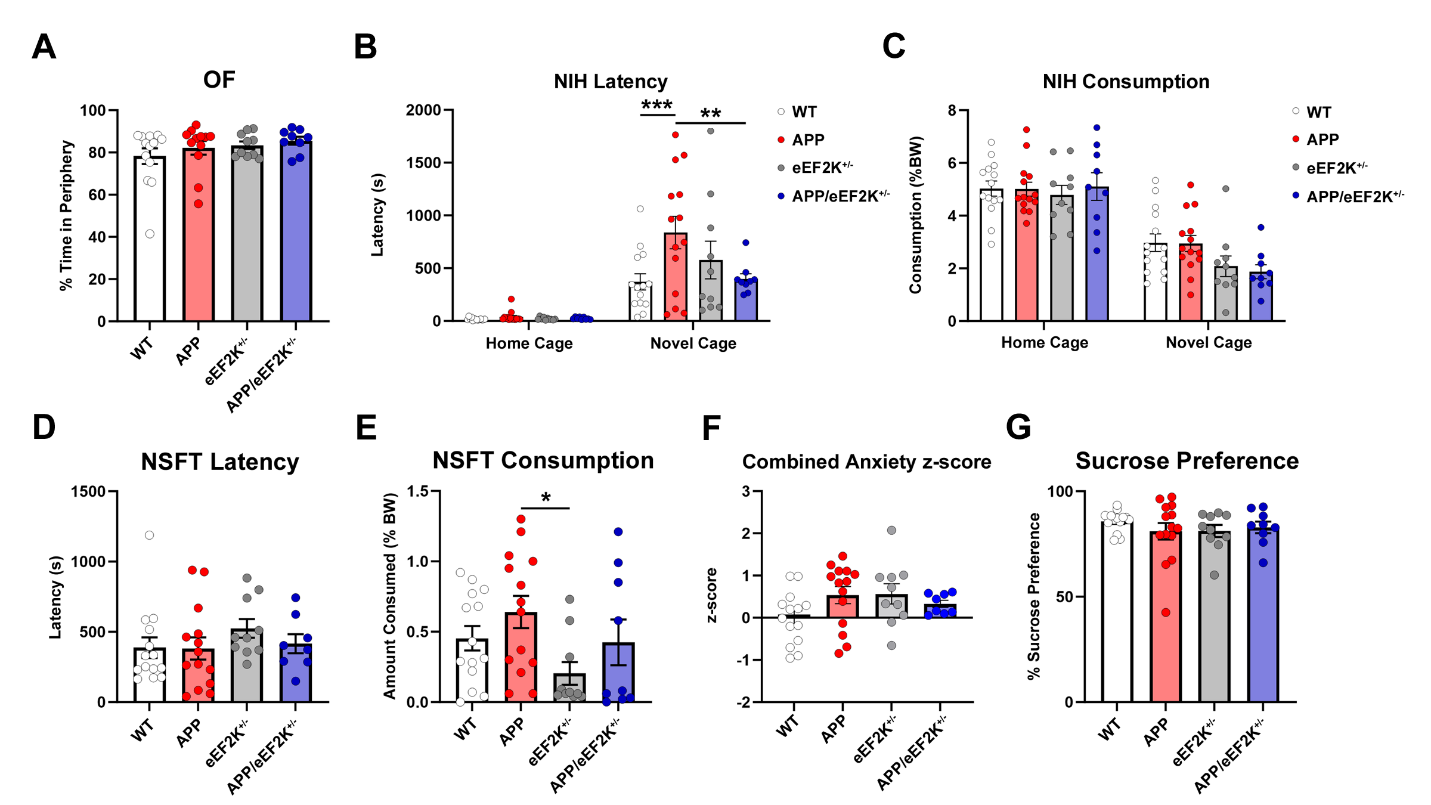


**Supplemental Figure 2: Neuronal eEF2K reduction in APP mice had no effect on anxiety-like behavior.**(**A**) Percent time spent in the periphery during OF was not significantly different between groups. WT, n=13; APP, n=12; eEF2K+/-, n=10; APP/eEF2K+/-, n=9. One-way ANOVA with Tukey’s post hoc test. (**B**) Latency to drink in the home cage (day 4) and in the novel cage (day 5) in the NIH task. APP mice took longer to drink in the novel cage compared to WT and APP/eEF2K+/- mice. WT, n=14; APP, n=14; eEF2K+/-, n=10; APP/eEF2K+/-, n=9. 2-way ANOVA with Tukey’s post hoc. (**C**) Amount consumed as percent body weight in the home cage and novel cage in the NIH task. All groups had decreased consumption in the novel cage but did not significantly differ from each other. WT, n=14; APP, n=14; eEF2K+/-, n=10; APP/eEF2K+/-, n=9. 2-way ANOVA with Tukey’s post hoc. (**D**) No difference in the latency to consume the food pellet in the NSFT. WT, n=14; APP, n=14; eEF2K+/-, n=10; APP/eEF2K+/-, n=8. One-way ANOVA with Tukey’s post hoc. (**E**) APP mice consumed more food pellet in 5 min following NSFT compared to eEF2K+/- mice. WT, n=14; APP, n=14; eEF2K+/-, n=10; APP/eEF2K+/-, n=9. One-way ANOVA with Tukey’s post hoc. (**F**) There was no difference in the combined anxiety z-score between groups. WT, n=14; APP, n=14; eEF2K+/-, n=10; APP/eEF2K+/-, n=8. One-way ANOVA with Tukey’s post hoc. (**G**) There was no difference in sucrose preference between groups. WT, n=13; APP, n=14; eEF2K+/-, n=10; APP/eEF2K+/-, n=9. One-way ANOVA with Tukey’s post hoc test. Error bars represent ± SEM. *p<0.05, **p<0.01, ***p<0.001.


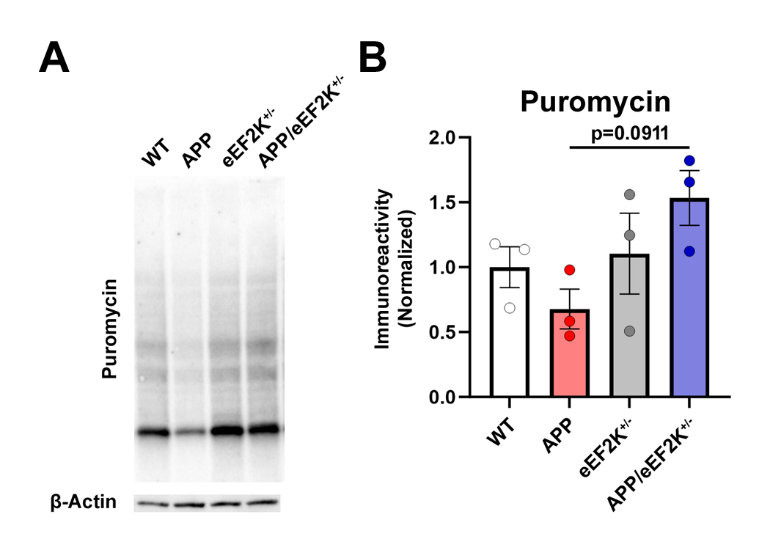


**Supplemental Figure 3: Trending increase of de novo protein synthesis in the APP/eEF2K+/- mice compared to the APP mice.**(**A**) Representative western blot image for puromycin and β-Actin (**B**) Western blot analysis of puromycin incorporation in the SUnSET assay to measure *de novo* protein synthesis. WT, n=3; APP, n=3; eEF2K+/-, n=3; APP/eEF2K+/-, n=3. One-way ANOVA with Tukey’s post hoc test.

**
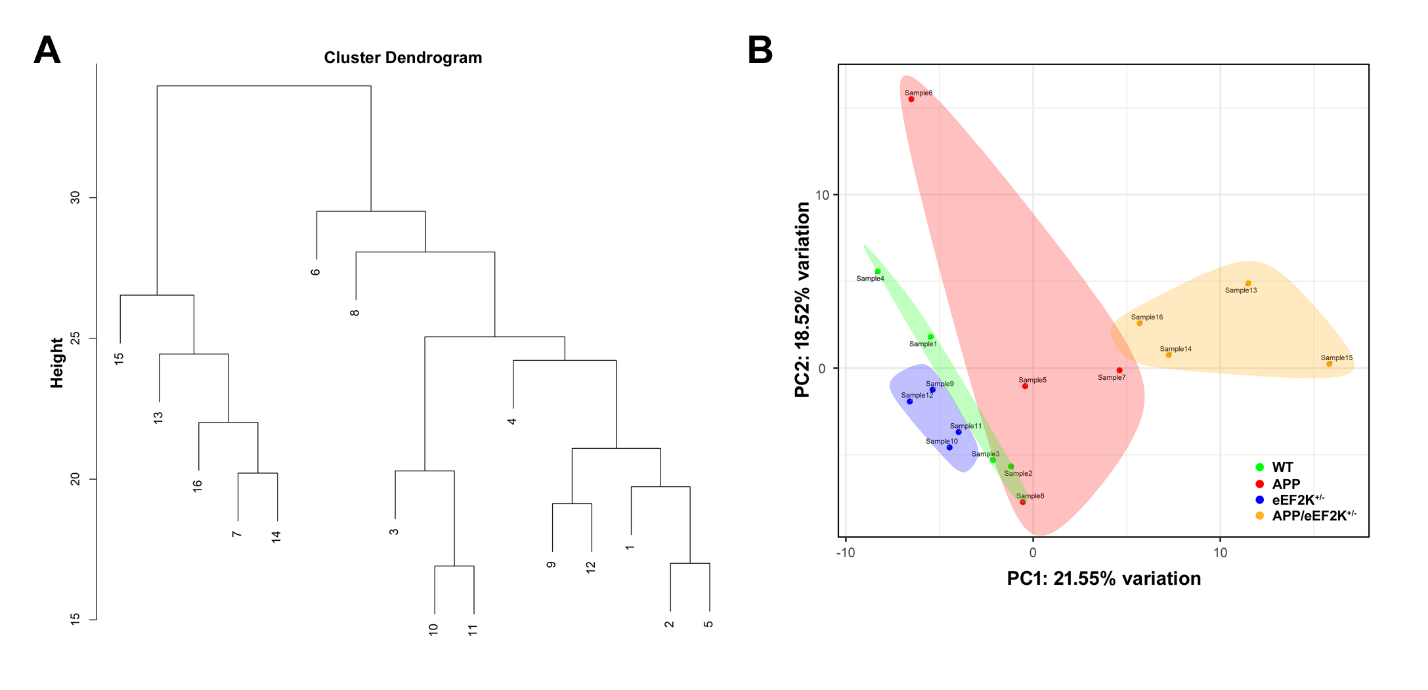
**

**Supplemental Figure 4: Hierarchical clustering and PCA analysis of proteomics samples.** (**A**) Hierarchical clustering analysis to determine presence of outliers. (**B**) PCA analysis of proteomics samples.

**
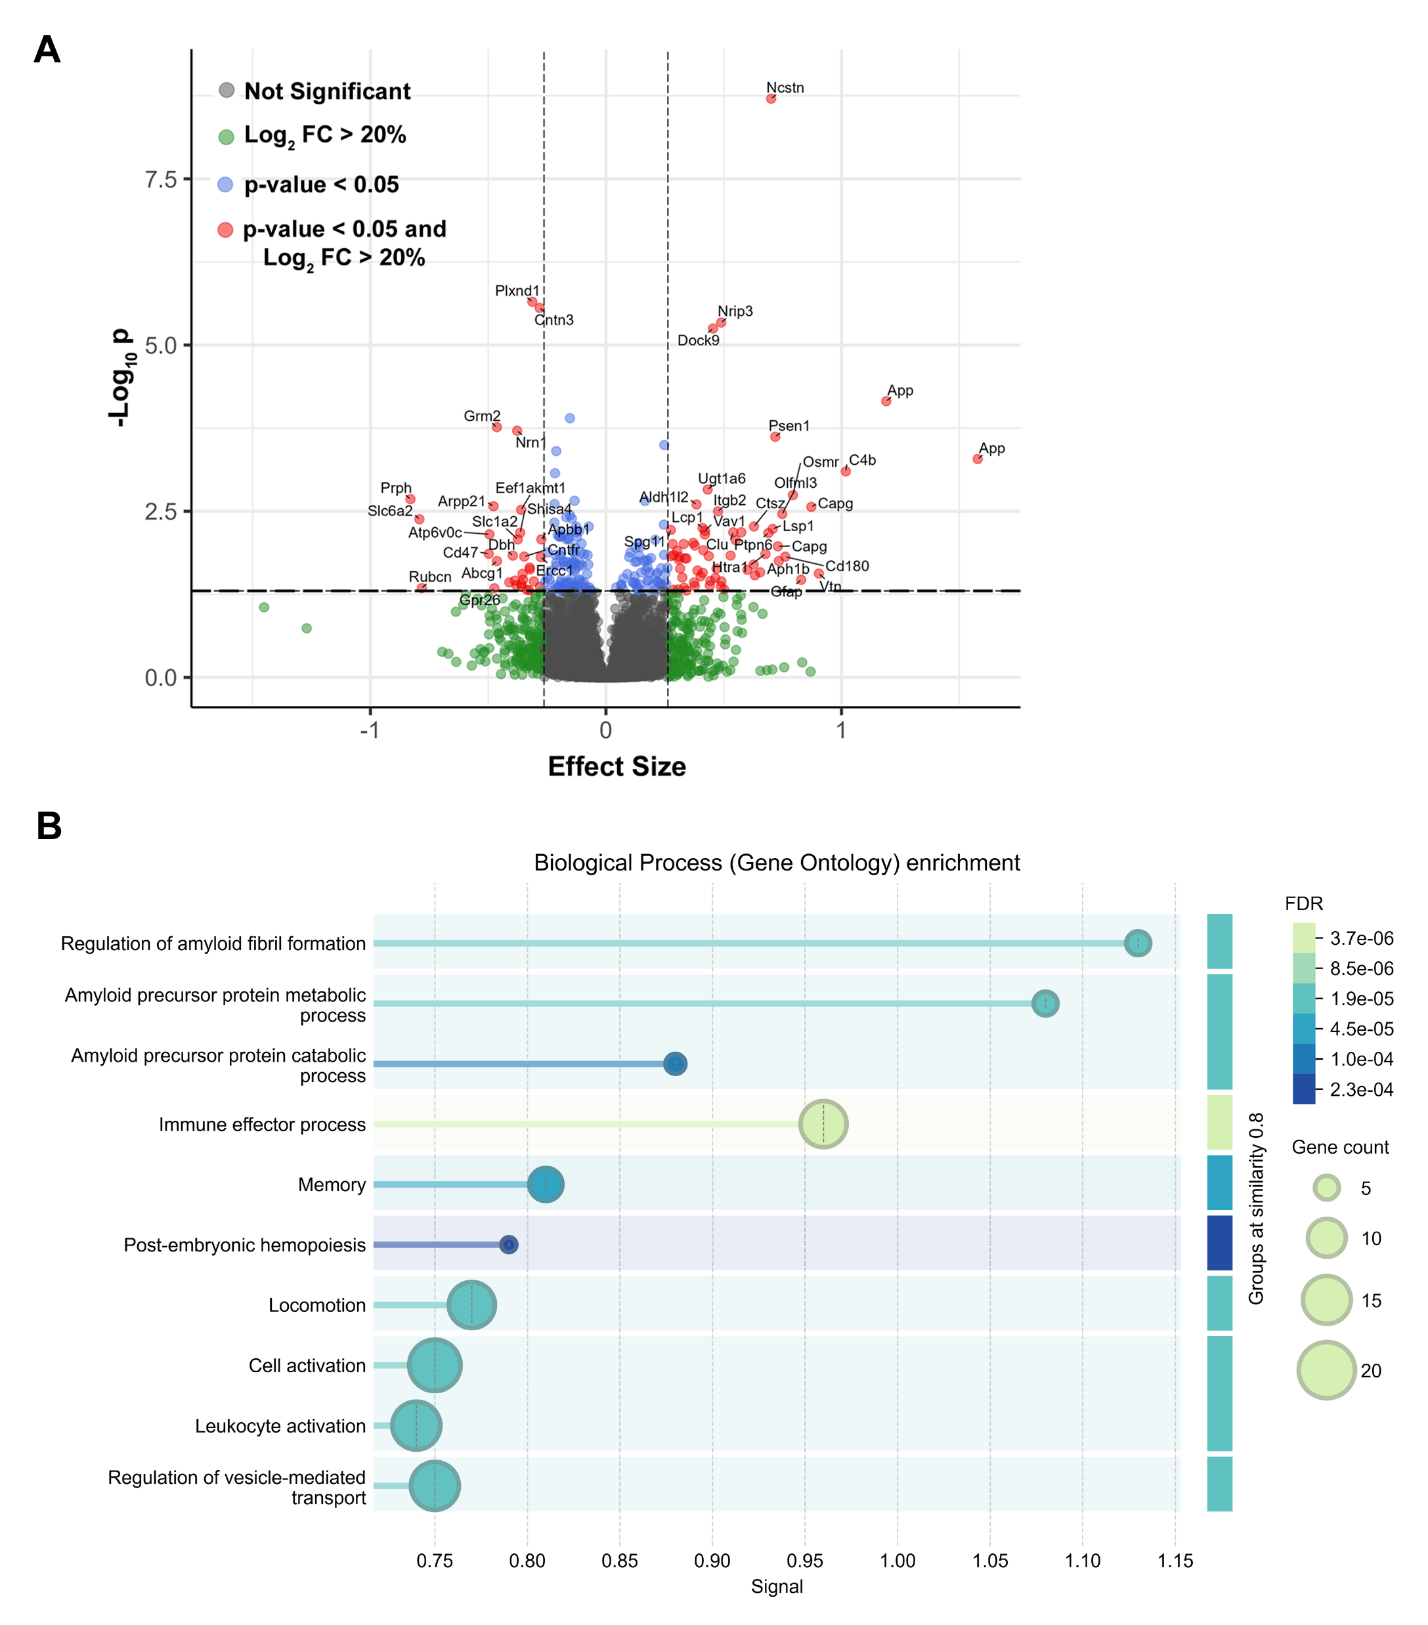
**

**Supplemental Figure 5: Proteomic analysis of APP vs. WT mice shows an** **increase in proteins related to amyloid pathology and immune processes.** (**A**) Volcano plot showing the distribution of differently regulated proteins in the APP group compared to the WT group. Gray circles are the proteins that were not significantly altered. Green circles represent proteins that had a fold change greater than 20% but were not significant. Blue circles represent proteins that were significantly changed but had a fold change less than 20%. Red circles represent the proteins that were significant and had a fold change greater than 20%. (**D**) Gene ontology enrichment analysis of all proteins that met the p-value and fold change requirements.

**
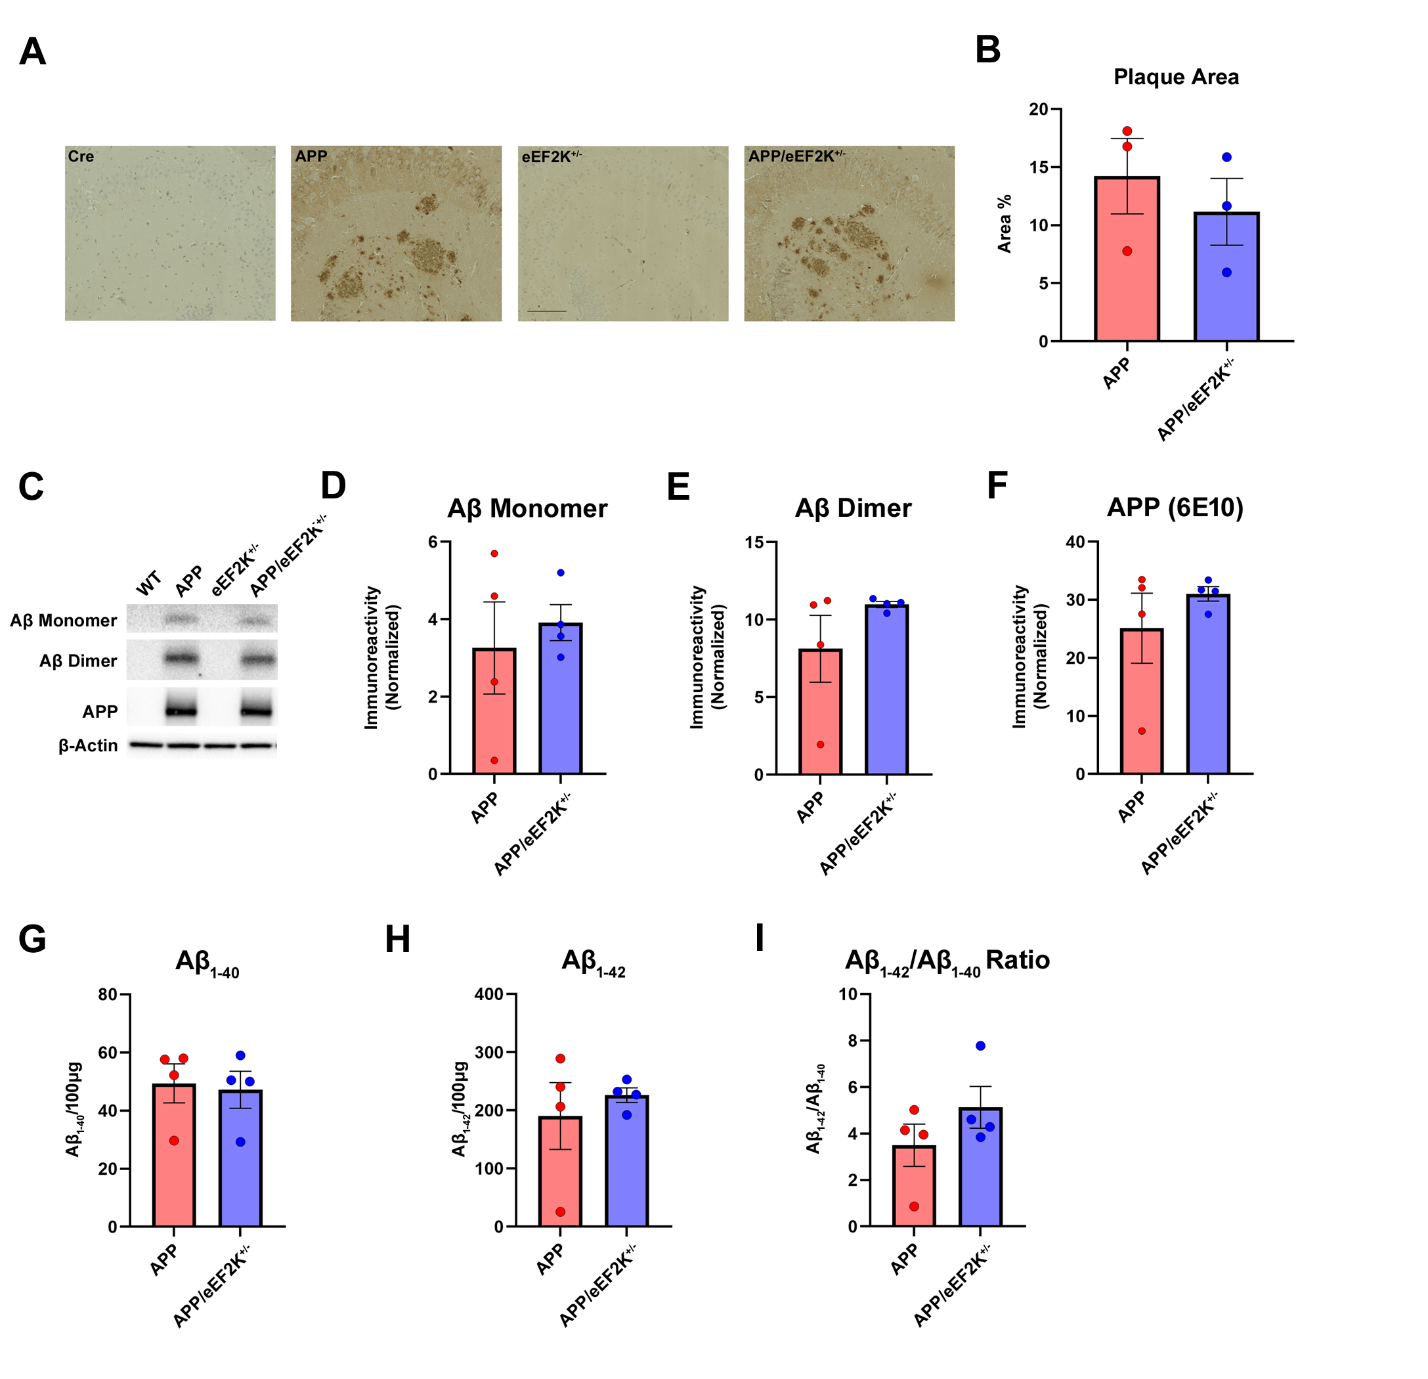
**

**Supplemental Figure 6: Neuronal suppression of eEF2K did not alter Aβ pathology.** (**A**) Representative images of immunohistochemistry of Aβ plaques in the hippocampus. Magnification = 40x. Scale bar = 100μm. (**B**) Quantification of Aβ plaque area as a percentage of total area. WT, n=3; APP, n=3; eEF2K+/-, n=3; APP/eEF2K+/-, n=3. (**C**) Representative western blot image for Aβ monomer and dimer, APP, and β-Actin as measured using the 6E10 antibody. (**D**) Western blot analysis shows increased Aβ monomer in APP and APP/eEF2K+/- mice. WT, n=4; APP, n=3; eEF2K+/-, n=4; APP/eEF2K+/-, n=4. (**E**) Western blot analysis shows increased Aβ dimer in APP and APP/eEF2K+/- mice. WT, n=4; APP, n=4; eEF2K+/-, n=4; APP/eEF2K+/-, n=4. (**F**) Western blot analysis shows increased APP in APP and APP/eEF2K+/- mice. WT, n=4; APP, n=4; eEF2K+/-, n=4; APP/eEF2K+/-, n=4. (**G**) ELISA analysis shows increased Aβ1-40 in APP and APP/eEF2K+/- mice. WT, n=4; APP, n=4; eEF2K+/-, n=4; APP/eEF2K+/-, n=4. (**H**) ELISA analysis shows increased Aβ1-42 in APP and APP/eEF2K+/- mice. WT, n=4; APP, n=4; eEF2K+/-, n=4; APP/eEF2K+/-, n=4. (**I**) ELISA analysis shows increased Aβ1-42/Aβ1-40 ratio in APP and APP/eEF2K+/- mice. WT, n=4; APP, n=4; eEF2K+/-, n=4; APP/eEF2K+/-, n=4. Error bars represent ± SEM.

**Supplemental Tables**

| **Supplemental Table 1: Upregulated and downregulated proteins in APP vs. WT** | | | | |
| --- | --- | --- | --- | --- |
| **Accession** | **Gene** | **p-value** | **Fold Change** | **Expression** |
| P12023-2 | App | 0.001 | 1.579 | UP |
| P12023 | App | 0.000 | 1.190 | UP |
| P01029 | C4b | 0.001 | 1.019 | UP |
| P29788 | Vtn | 0.027 | 0.904 | UP |
| D3YTL5;Q3TNN6;Q3UJ44;Q99LB4 | Capg | 0.003 | 0.872 | UP |
| P03995 | Gfap | 0.034 | 0.829 | UP |
| O70458;O70458-2 | Osmr | 0.002 | 0.794 | UP |
| Q62192 | Cd180 | 0.015 | 0.762 | UP |
| Q8BK62 | Olfml3 | 0.003 | 0.749 | UP |
| Q8C7N7;Q8C7N7-2 | Aph1b | 0.018 | 0.734 | UP |
| P24452 | Capg | 0.011 | 0.730 | UP |
| P49769 | Psen1 | 0.000 | 0.719 | UP |
| P19973-2 | Lsp1 | 0.006 | 0.708 | UP |
| P57716 | Ncstn | 0.000 | 0.701 | UP |
| P29351;P29351-2 | Ptpn6 | 0.007 | 0.690 | UP |
| Q9R118 | Htra1 | 0.014 | 0.677 | UP |
| Q9ES52;Q9ES52-2;Q9ES52-3 | Inpp5d | 0.026 | 0.655 | UP |
| Q9JHK5 | Plek | 0.029 | 0.633 | UP |
| Q9WUU7 | Ctsz | 0.005 | 0.628 | UP |
| P08226 | Apoe | 0.020 | 0.627 | UP |
| Q8BLY1;Q8BLY1-2 | Smoc1 | 0.024 | 0.600 | UP |
| Q9Z0L8;Q9Z0L8-2 | Ggh | 0.007 | 0.575 | UP |
| P20060 | Hexb | 0.009 | 0.551 | UP |
| Q06890 | Clu | 0.007 | 0.540 | UP |
| P36898 | Bmpr1b | 0.015 | 0.529 | UP |
| A0A0R4J1B4;E9Q5K8;E9Q604;G5E8F1;Q3U1U4 | Itgam | 0.048 | 0.502 | UP |
| A0A0R4J211;A0A1W2P6R9;A0A1Y7VNM7;G5E825 | Arhgef25 | 0.036 | 0.490 | UP |
| Q9JJR9 | Nrip3 | 0.000 | 0.489 | UP |
| P27641 | Xrcc5 | 0.043 | 0.488 | UP |
| P11835 | Itgb2 | 0.003 | 0.476 | UP |
| Q925G2 | Cybrd1 | 0.023 | 0.470 | UP |
| P12265 | Gusb | 0.032 | 0.464 | UP |
| Q8BIK4-2 | Dock9 | 0.000 | 0.455 | UP |
| Q8BWY7;Q8BWY7-2;Q8BWY7-3 | Slc39a11 | 0.035 | 0.443 | UP |
| O55098 | Stk10 | 0.041 | 0.441 | UP |
| Q9D2R8 | Mrps33 | 0.015 | 0.437 | UP |
| Q64435 | Ugt1a6 | 0.001 | 0.432 | UP |
| P27870 | Vav1 | 0.006 | 0.421 | UP |
| Q8VDS3 | Cbx7 | 0.007 | 0.420 | UP |
| P05555 | Itgam | 0.012 | 0.414 | UP |
| O09159 | Man2b1 | 0.027 | 0.411 | UP |
| Q61233 | Lcp1 | 0.006 | 0.410 | UP |
| O35454 | Clcn6 | 0.030 | 0.402 | UP |
| Q9WV32 | Arpc1b | 0.025 | 0.389 | UP |
| Q8K009 | Aldh1l2 | 0.002 | 0.385 | UP |
| Q9Z1Q5 | Clic1 | 0.042 | 0.377 | UP |
| Q8BHL3 | Tbc1d10b | 0.010 | 0.377 | UP |
| P41731 | Cd63 | 0.037 | 0.374 | UP |
| Q8R5A3 | Apbb1ip | 0.009 | 0.371 | UP |
| Q8C3J5 | Dock2 | 0.016 | 0.342 | UP |
| O88653 | Lamtor3 | 0.049 | 0.342 | UP |
| Q5KU39 | Vps41 | 0.016 | 0.335 | UP |
| P35951 | Ldlr | 0.045 | 0.331 | UP |
| P17047 | Lamp2 | 0.010 | 0.330 | UP |
| P51880 | Fabp7 | 0.031 | 0.324 | UP |
| E9Q634 | Myo1e | 0.023 | 0.315 | UP |
| Q05AA6 | Drp2 | 0.015 | 0.312 | UP |
| Q3URR4;Q9EQ07;Q9EQ08 | Sgsh | 0.017 | 0.309 | UP |
| Q8K1X4 | Nckap1l | 0.048 | 0.307 | UP |
| O08576 | Rundc3a | 0.012 | 0.302 | UP |
| Q9R0N3 | Syt11 | 0.015 | 0.288 | UP |
| A2A9C3 | Szt2 | 0.048 | 0.287 | UP |
| P42227 | Stat3 | 0.010 | 0.284 | UP |
| Q3UHA3 | Spg11 | 0.006 | 0.275 | UP |
| Q3UIA2;Q3UIA2-2 | Arhgap17 | 0.015 | 0.275 | UP |
| P15331;P15331-3 | Prph | 0.002 | -0.830 | Down |
| O55192 | Slc6a2 | 0.004 | -0.792 | Down |
| Q80U62;Q80U62-2;Q80U62-3;Q80U62-4 | Rubcn | 0.045 | -0.782 | Down |
| Q61735 | Cd47 | 0.014 | -0.498 | Down |
| P63082 | Atp6v0c | 0.007 | -0.495 | Down |
| Q9DCB4 | Arpp21 | 0.003 | -0.477 | Down |
| Q8BZA7 | Gpr26 | 0.046 | -0.474 | Down |
| Q14BI2 | Grm2 | 0.000 | -0.463 | Down |
| Q64343 | Abcg1 | 0.018 | -0.463 | Down |
| O70161-2 | Pip5k1c | 0.037 | -0.410 | Down |
| Q64237 | Dbh | 0.015 | -0.396 | Down |
| Q91YL2 | Rnf126 | 0.035 | -0.387 | Down |
| Q3U1F9 | Pag1 | 0.041 | -0.380 | Down |
| Q8CFV4 | Nrn1 | 0.000 | -0.377 | Down |
| F6ZRK3;X2D841 | Slc1a2 | 0.008 | -0.374 | Down |
| Q8CA71 | Shisa4 | 0.007 | -0.364 | Down |
| Q9CY45 | Eef1akmt1 | 0.003 | -0.360 | Down |
| Q08AU7 | Myadml2 | 0.039 | -0.359 | Down |
| Q9Z0P4 | Palm | 0.043 | -0.358 | Down |
| Q9Z1R2 | Bag6 | 0.028 | -0.354 | Down |
| E9PZ19 | Igsf9b | 0.034 | -0.351 | Down |
| O88507 | Cntfr | 0.015 | -0.347 | Down |
| A0A0R4J1Q0;D6RE33;F6ZJ27;G5E896 | Edc4 | 0.048 | -0.336 | Down |
| Q570Y9 | Deptor | 0.049 | -0.327 | Down |
| Q8K221 | Arfip2 | 0.022 | -0.324 | Down |
| A0A1L1SUI3;Q9D1F9 | Slc37a4 | 0.024 | -0.323 | Down |
| Q3UH93 | Plxnd1 | 0.000 | -0.313 | Down |
| Q8R332;Q8R332-2;Q8R332-3;Q8R332-4 | Nup58 | 0.036 | -0.306 | Down |
| Q07409 | Cntn3 | 0.000 | -0.281 | Down |
| D3YVV3 | Ankrd29 | 0.043 | -0.280 | Down |
| P07903 | Ercc1 | 0.015 | -0.277 | Down |
| Q9QXJ1;Q9QXJ1-2 | Apbb1 | 0.008 | -0.274 | Down |

| **Supplemental Table 2: Upregulated and downregulated proteins in APPeEF2K+/- vs. APP** | | | | |
| --- | --- | --- | --- | --- |
| **Accession** | **Genes** | **p-value** | **Fold Change** | **Expression** |
| Q91VR8 | Brk1 | 0.000 | 1.879 | UP |
| P20065;P20065-2 | Tmsb4x | 0.000 | 1.593 | UP |
| Q9QXV0 | Pcsk1n | 0.001 | 1.555 | UP |
| Q9WVA2 | Timm8a1 | 0.001 | 1.542 | UP |
| P97450 | Atp5pf | 0.001 | 1.538 | UP |
| P63213 | Gng2 | 0.000 | 1.374 | UP |
| Q9ERT9 | Ppp1r1a | 0.003 | 1.315 | UP |
| P48771 | Cox7a2 | 0.001 | 1.199 | UP |
| P31786 | Dbi | 0.019 | 1.156 | UP |
| P62075 | Timm13 | 0.003 | 1.156 | UP |
| P34884 | Mif | 0.003 | 1.154 | UP |
| P28798 | Grn | 0.019 | 1.092 | UP |
| A0A3B2WBC6 | Polr2m | 0.009 | 1.091 | UP |
| Q9D1K2 | Atp6v1f | 0.002 | 1.072 | UP |
| Q9D6J5 | Ndufb8 | 0.010 | 1.061 | UP |
| P17665 | Cox7c | 0.008 | 1.031 | UP |
| Q9WV98 | Timm9 | 0.022 | 1.006 | UP |
| Q61016 | Gng7 | 0.012 | 0.982 | UP |
| P99028 | Uqcrh | 0.016 | 0.897 | UP |
| Q8BZA7 | Gpr26 | 0.001 | 0.888 | UP |
| P63040 | Cplx1 | 0.042 | 0.885 | UP |
| Q9D164;Q9D164-2 | Fxyd6 | 0.001 | 0.882 | UP |
| Q9JMG3;Q9JMG3-2 | Tmub1 | 0.000 | 0.850 | UP |
| Q9DAF3 | Ddi1 | 0.017 | 0.808 | UP |
| P60761 | Nrgn | 0.026 | 0.786 | UP |
| Q78T54 | Vma21 | 0.015 | 0.786 | UP |
| P84086 | Cplx2 | 0.026 | 0.782 | UP |
| P50153 | Gng4 | 0.031 | 0.759 | UP |
| P60879-2 | Snap25 | 0.002 | 0.757 | UP |
| Q9WTL7 | Lypla2 | 0.044 | 0.742 | UP |
| P03930 | Mtatp8 | 0.004 | 0.724 | UP |
| Q9CQW9 | Ifitm3 | 0.023 | 0.706 | UP |
| Q9CQE8 | RTRAF | 0.047 | 0.655 | UP |
| Q8BTY2-2 | Slc4a7 | 0.027 | 0.628 | UP |
| Q8VHX6;Q8VHX6-2 | Flnc | 0.030 | 0.623 | UP |
| P0CW02 | Ly6c1 | 0.049 | 0.615 | UP |
| Q9Z239 | Fxyd1 | 0.012 | 0.613 | UP |
| Q9CQ74 | Leprotl1 | 0.011 | 0.610 | UP |
| Q9JL62 | Gltp | 0.020 | 0.603 | UP |
| P20152 | Vim | 0.029 | 0.589 | UP |
| P63216 | Gng3 | 0.001 | 0.586 | UP |
| Q91X97 | Ncald | 0.015 | 0.579 | UP |
| Q80SZ7 | Gng5 | 0.016 | 0.577 | UP |
| Q8K211 | Slc31a1 | 0.041 | 0.562 | UP |
| O89013 | Leprot | 0.007 | 0.558 | UP |
| A0A1L1SUI3;Q9D1F9 | Slc37a4 | 0.000 | 0.552 | UP |
| P29595 | Nedd8 | 0.037 | 0.547 | UP |
| Q9JIN6 | Kcnmb4 | 0.028 | 0.540 | UP |
| Q8R3S2;Q8R3S2-2 | Tspan33 | 0.042 | 0.534 | UP |
| P63082 | Atp6v0c | 0.005 | 0.524 | UP |
| Q9DAS9 | Gng12 | 0.042 | 0.519 | UP |
| P63044 | Vamp2 | 0.029 | 0.512 | UP |
| Q9JMF7 | Dolpp1 | 0.023 | 0.511 | UP |
| Q9D6J1 | Cers4 | 0.039 | 0.487 | UP |
| Q9D882 | Fam241b | 0.014 | 0.482 | UP |
| Q9JKZ2 | Slc5a3 | 0.016 | 0.466 | UP |
| Q8BWH0 | Slc38a7 | 0.012 | 0.464 | UP |
| Q9JLR1 | Sec61a2 | 0.019 | 0.461 | UP |
| O70131 | Ninj1 | 0.023 | 0.460 | UP |
| P15379;P15379-10;P15379-11;P15379-2;P15379-3;P15379-4;P15379-5;P15379-6;P15379-7;P15379-8;P15379-9 | Cd44 | 0.043 | 0.454 | UP |
| Q8R2Y3 | Dolk | 0.045 | 0.444 | UP |
| Q8K358 | Pigu | 0.046 | 0.441 | UP |
| Q5DTU0 | Afap1l2 | 0.003 | 0.440 | UP |
| Q9JJG6 | Tmem47 | 0.013 | 0.435 | UP |
| P62748 | Hpcal1 | 0.044 | 0.433 | UP |
| O89016 | Abcd4 | 0.024 | 0.421 | UP |
| E9PWX1 | Dpp6 | 0.031 | 0.420 | UP |
| Q61735 | Cd47 | 0.047 | 0.403 | UP |
| Q9CZE3 | Rab32 | 0.049 | 0.396 | UP |
| P00848 | Mtatp6 | 0.027 | 0.391 | UP |
| Q9D771 | Pacc1 | 0.020 | 0.390 | UP |
| Q9QXW9 | Slc7a8 | 0.002 | 0.389 | UP |
| O35089 | Cnih2 | 0.042 | 0.380 | UP |
| A0A1L7NR63 | Sorbs1 | 0.033 | 0.370 | UP |
| Q8VHL0-2 | Slc14a1 | 0.018 | 0.366 | UP |
| Q8K009 | Aldh1l2 | 0.004 | 0.364 | UP |
| Q7M6Z0 | Rtn4rl2 | 0.005 | 0.357 | UP |
| Q8K304;Q8K304-2 | Tmem129 | 0.046 | 0.353 | UP |
| Q8VHK5 | Mlc1 | 0.015 | 0.353 | UP |
| P11214 | Plat | 0.017 | 0.341 | UP |
| Q8K330;Q8K330-2 | Ssh3 | 0.034 | 0.314 | UP |
| Q8VDW0 | Ddx39a | 0.005 | 0.313 | UP |
| A0A286YDC3;A0A2C9F2A2 | Rin1 | 0.005 | 0.313 | UP |
| Q9Z127 | Slc7a5 | 0.010 | 0.312 | UP |
| Q3U9U9 | Eif4g2 | 0.038 | 0.310 | UP |
| Q9JJJ7;Q9JJJ7-2;Q9JJJ7-3;Q9JJJ7-4 | Porcn | 0.014 | 0.308 | UP |
| P16014 | Chgb | 0.023 | 0.306 | UP |
| Q8CA71 | Shisa4 | 0.021 | 0.306 | UP |
| Q9CR64;Q9CR64-2 | Tmem167a | 0.022 | 0.298 | UP |
| Q91V01 | Lpcat3 | 0.039 | 0.296 | UP |
| Q60673 | Ptprn | 0.042 | 0.295 | UP |
| O08739 | Ampd3 | 0.046 | 0.281 | UP |
| P42227-3 | Stat3 | 0.045 | 0.279 | UP |
| Q8BXR1 | Slc7a14 | 0.019 | 0.273 | UP |
| Q3UM29 | Cog7 | 0.020 | 0.270 | UP |
| Q8R420 | Abca3 | 0.018 | 0.269 | UP |
| O88839;O88839-2;O88839-3 | Adam15 | 0.013 | 0.266 | UP |
| G3UYZ1 | Igsf8 | 0.003 | -0.849 | Down |
| B0LAC8 | Atp6v1b2 | 0.034 | -0.721 | Down |
| S4R1W8 | Gapdh | 0.032 | -0.607 | Down |
| Q8R2X8;Q8R2X8-2 | Blzf1 | 0.019 | -0.578 | Down |
| Q8R034 | Anapc13 | 0.039 | -0.563 | Down |
| Q8BZ97 | Prdm8 | 0.046 | -0.553 | Down |
| Q9ERC8 | Dscam | 0.048 | -0.539 | Down |
| Q9D3W4 | Gpn3 | 0.008 | -0.501 | Down |
| Q52KG3 | Magee2 | 0.022 | -0.473 | Down |
| Q66JT5 | Tpgs2 | 0.039 | -0.392 | Down |
| Q9D868-2 | Ppih | 0.001 | -0.365 | Down |
| Q9Z275 | Rlbp1 | 0.041 | -0.352 | Down |
| Q8VDS3 | Cbx7 | 0.031 | -0.333 | Down |
| P23927 | Cryab | 0.028 | -0.329 | Down |
| Q8BXJ8;Q8BXJ8-2 | Znf385b | 0.025 | -0.327 | Down |
| P70181;P70181-2 | Pip5k1b | 0.011 | -0.322 | Down |
| P19157 | Gstp1 | 0.014 | -0.317 | Down |
| Q9Z129;Q9Z129-2 | Recql | 0.050 | -0.316 | Down |
| Q8BWU3 | Fam131a | 0.011 | -0.311 | Down |
| Q9JM14 | Nt5c | 0.004 | -0.310 | Down |
| Q05AA6 | Drp2 | 0.020 | -0.299 | Down |
| Q8BXJ9 | Tmem62 | 0.029 | -0.292 | Down |
| Q6PHZ8 | Kcnip4 | 0.010 | -0.281 | Down |
| A3KMP2 | Ttc38 | 0.047 | -0.280 | Down |
| Q91VM9 | Ppa2 | 0.006 | -0.275 | Down |
| Q91X84 | Crtc3 | 0.006 | -0.275 | Down |
